# Supplementary material for: Indocyanine green conjugated lipid microbubbles as an ultrasound-responsive drug delivery system for dual-imaging guided tumor-targeted therapy
Source: Royal Society of Chemistry journal article supplement (doi:10.1039/c8ra03193b), 2018-01-01
Supplement: c8ra03193b1.pdf [file c8ra03193b1.pdf]

## Supplementary information

### **Indocyanine green conjugated lipid microbubbles as an ultrasound-responsive drug delivery system for dual-imaging guided tumor-targeted therapy**

Yan Li<sup>1a</sup>, Wenqi Huang<sup>1b\*</sup>, Chunyan Li<sup>c</sup>, and Xiaoteng Huang<sup>d</sup>

<sup>a</sup> Department of Ultrasound, the First People's Hospital of Shangqiu City, Shangqiu, Henan 476100, China.

<sup>b</sup> Medical Imaging Center, the First People's Hospital of Shangqiu City, Shangqiu, Henan 476100, China.

<sup>c</sup> Department of Neurology, the First People's Hospital of Shangqiu City, Shangqiu, Henan 476100, China.

<sup>d</sup> Henan University of Chinese Medicine, Zhengzhou, Henan 450046, China.

\*Correspondence: Wenqi Huang

E-mail: [huangwq0613@sohu.com](mailto:huangwq0613@sohu.com); Tel: +86-13781446699

<sup>1</sup> These authors contribute equally.

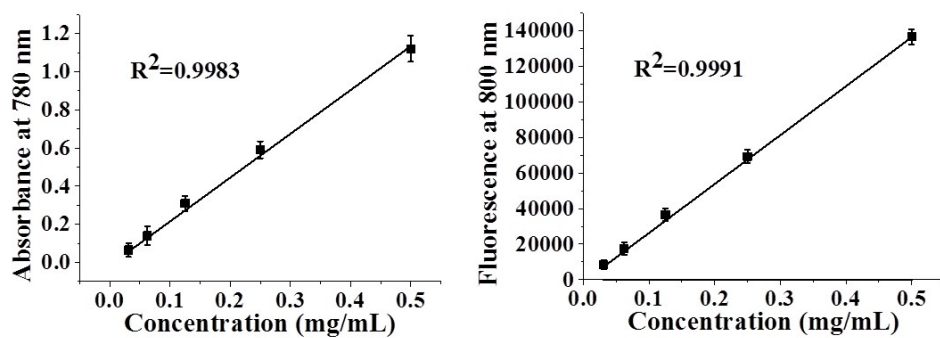

**Figure S1.** The abs. and Flu. spectra of the MBs at concentration of 0.5, 0.25, 0.125, 0.0625, 0.03125 mg/mL.

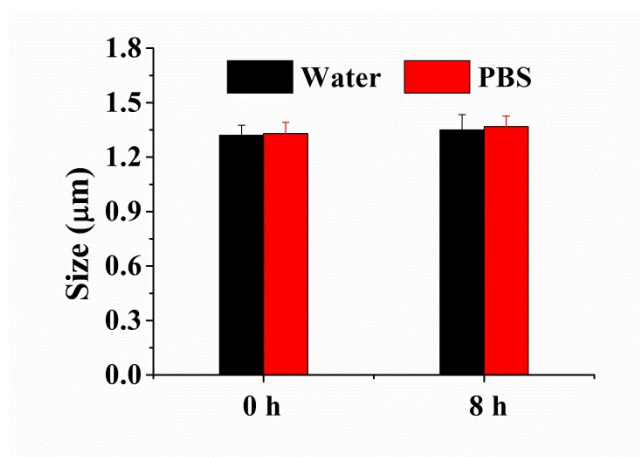

**Figure S2.** The size change of RILMBs-FA in water and PBS after 8 h using a Zetasizer.
